# Supplementary material for: Community-based HIV self-testing: a cluster-randomised trial of supply-side financial incentives and time-trend analysis of linkage to antiretroviral therapy in Zimbabwe
Source: PubMed Central journal article supplement — BMJ Glob Health. 2021 Jul 13;6(Suppl 4):e003866. doi: 10.1136/bmjgh-2020-003866 (PMC8287602; doi:10.1136/bmjgh-2020-003866), 2021-07-13
Supplement: bmjgh-2020-003866supp002.pdf [file bmjgh-2020-003866supp002.pdf]

**Appendix 2. Effect of CBDA incentive on linkage to additional care and uptake of self-testing after adjustment for clustering at household level**

|                                  | Conditional incentive |      | No incentive |      | Prevalence ratio     |         |                      | N     |         |
|----------------------------------|-----------------------|------|--------------|------|----------------------|---------|----------------------|-------|---------|
|                                  | No.                   | %    | No.          | %    | Crude<br>(95% CI)    | p-value | Adjusted<br>(95% CI) |       | p-value |
| <b>Primary outcome</b>           |                       |      |              |      |                      |         |                      |       |         |
| Linkage to any services          | 1062                  | 28.7 | 1075         | 31.2 | 0.92<br>(0.84, 1.01) | 0.084   | 0.94<br>(0.86, 1.03) | 0.179 | 7146    |
| <b>Secondary outcomes</b>        |                       |      |              |      |                      |         |                      |       |         |
| Uptake of self-testing           | 1770                  | 47.9 | 1823         | 52.9 | 0.9<br>(0.80, 1.02)  | 0.089   | 0.91<br>(0.80, 1.02) | 0.114 | 7146    |
| Uptake of PSI New Start services | 94                    | 5.3  | 106          | 5.8  | 0.92<br>(0.69, 1.23) | 0.574   | 0.92<br>(0.68, 1.24) | 0.581 | 3593    |

Adjusted models include adjustment for educational attainment (none/primary, some secondary, O-levels complete, A-levels and above), household food insecurity (moderate/severe food insecurity, no/mild food insecurity), and high SSQ (Shona Symptom Questionnaire) score (9 or higher).
