# Supplementary material for: Community-based HIV self-testing: a cluster-randomised trial of supply-side financial incentives and time-trend analysis of linkage to antiretroviral therapy in Zimbabwe
Source: PubMed Central journal article supplement — BMJ Glob Health. 2021 Jul 13;6(Suppl 4):e003866. doi: 10.1136/bmjgh-2020-003866 (PMC8287602; doi:10.1136/bmjgh-2020-003866), 2021-07-13
Supplement: bmjgh-2020-003866supp003.pdf [file bmjgh-2020-003866supp003.pdf]

**Appendix 3. Stratum-specific frequency and percent linking to care and prevalence ratios and prevalence differences comparing intervention effect by sex, age, household food insecurity, and SSQ score**

|                                   | Percent seeking care  |       |              |       | Prevalence ratio | (95% CI)     | Prevalence difference | (95% CI)        | p-value | N     |
|-----------------------------------|-----------------------|-------|--------------|-------|------------------|--------------|-----------------------|-----------------|---------|-------|
|                                   | Conditional incentive |       | No incentive |       |                  |              |                       |                 |         |       |
|                                   | No.                   | %     | No.          | %     |                  |              |                       |                 |         |       |
| <b>Sex</b>                        |                       |       |              |       |                  |              |                       |                 |         |       |
| Men                               | 338                   | 23.9  | 364          | 26.9  | 0.93             | (0.81, 1.07) | -0.018                | (-0.051, 0.015) | 0.295   | 2,767 |
| Women                             | 724                   | 31.7  | 711          | 33.94 | 0.95             | (0.87, 1.05) | -0.015                | (-0.045, 0.015) | 0.334   | 4,379 |
| <b>Age *</b>                      |                       |       |              |       |                  |              |                       |                 |         |       |
| Younger adults (up to 25 years)   | 322                   | 31.05 | 320          | 33.61 | 0.96             | (0.84, 1.11) | -0.011                | (-0.052, 0.030) | 0.593   | 1,989 |
| Older adults (26 years and older) | 740                   | 27.86 | 755          | 30.3  | 0.94             | (0.86, 1.04) | -0.017                | (-0.045, 0.011) | 0.225   | 5,148 |
| <b>Food insecurity</b>            |                       |       |              |       |                  |              |                       |                 |         |       |
| Food-secure household             | 412                   | 24.74 | 423          | 27.94 | 0.9              | (0.80, 1.03) | -0.025                | (-0.058, 0.007) | 0.123   | 3,179 |
| Food-insecure household           | 650                   | 31.97 | 652          | 33.71 | 0.98             | (0.89, 1.08) | -0.007                | (-0.039, 0.025) | 0.667   | 3,967 |
| <b>SSQ</b>                        |                       |       |              |       |                  |              |                       |                 |         |       |
| Lower SSQ (0-8)                   | 476                   | 26.4  | 422          | 27.17 | 0.95             | (0.87, 1.04) | -0.003                | (-0.033, 0.027) | 0.833   | 3,356 |
| Higher SSQ (9-14)                 | 586                   | 30.92 | 653          | 34.46 | 0.95             | (0.88, 1.03) | -0.03                 | (-0.064, 0.005) | 0.092   | 3,790 |

SSQ = Shona Symptom Questionnaire. Subgroup analyses of sex and age adjusted for educational attainment, household food insecurity, and SSQ. Subgroup analysis of food insecurity adjusted for educational attainment and SSQ. Subgroup analysis of SSQ adjusted for educational attainment and food insecurity.

\* 9 Respondents missing age
