# Supplementary material for: Community-based HIV self-testing: a cluster-randomised trial of supply-side financial incentives and time-trend analysis of linkage to antiretroviral therapy in Zimbabwe
Source: PubMed Central journal article supplement — BMJ Glob Health. 2021 Jul 13;6(Suppl 4):e003866. doi: 10.1136/bmjgh-2020-003866 (PMC8287602; doi:10.1136/bmjgh-2020-003866), 2021-07-13
Supplement: bmjgh-2020-003866supp004.pdf [file bmjgh-2020-003866supp004.pdf]

**Appendix 4: Results of difference in difference analysis****Appendix 4a: Monthly ART initiations in HIVST and non-HIVST areas at different time periods**

| Self-testing available | Time period       | Total initiations | Total months of follow-up | Initiations per month (crude) |
|------------------------|-------------------|-------------------|---------------------------|-------------------------------|
| Non-HIVST area         | Pre-distribution  | 5783              | 744                       | 7.77                          |
| HIVSTST area           | Pre-distribution  | 1754              | 240                       | 7.31                          |
| Non-HIVST area         | Distribution      | 1857              | 248                       | 7.49                          |
| HIVST area             | Distribution      | 767               | 80                        | 9.59                          |
| Non-HIVST area         | Post-distribution | 2030              | 298                       | 6.81                          |
| HIVST area             | Post-distribution | 617               | 93                        | 6.63                          |

**Appendix 4b. Difference-in-difference analysis of ART initiation rate per month in HIVST and non-HIVST areas**

|                                        | Rate ratio*<br>(95% CI) | p-value | Rate difference *<br>(95% CI) | p-value |
|----------------------------------------|-------------------------|---------|-------------------------------|---------|
| <b>Difference at baseline</b>          |                         |         |                               |         |
| Self-testing arm                       | 0.92<br>(0.82, 1.03)    | 0.18    | -0.28<br>(-1.11, 0.55)        | 0.51    |
| <b>Change over time - no HIVST arm</b> |                         |         |                               |         |
| During intervention                    | 1.12<br>(1.07, 1.16)    | <0.001  | -0.11<br>(-0.38, 0.15)        | 0.41    |
| After intervention                     | 0.91<br>(0.88, 0.95)    | <0.001  | -1.16<br>(-1.44, -0.89)       | <0.001  |
| <b>Interaction - HIVST * time</b>      |                         |         |                               |         |
| During intervention                    | 1.27<br>(1.17, 1.39)    | <0.001  | 1.79<br>(1.23, 2.35)          | <0.001  |
| After intervention                     | 0.99<br>(0.91, 1.08)    | 0.85    | -0.1<br>(-0.65, 0.45)         | 0.72    |
| Constant                               | 0.249<br>(0.22, 0.28)   | <0.001  | 3.67<br>(2.95, 4.38)          | <0.001  |

\* Adjusted for variables in the model and clinic district
