# Supplementary figures and images for: Community-based HIV self-testing: a cluster-randomised trial of supply-side financial incentives and time-trend analysis of linkage to antiretroviral therapy in Zimbabwe
Source: PubMed Central journal article supplement — BMJ Glob Health. 2021 Jul 13;6(Suppl 4):e003866. doi: 10.1136/bmjgh-2020-003866 (PMC8287602; doi:10.1136/bmjgh-2020-003866), 2021-07-13

## Appendix 1: Trial communities

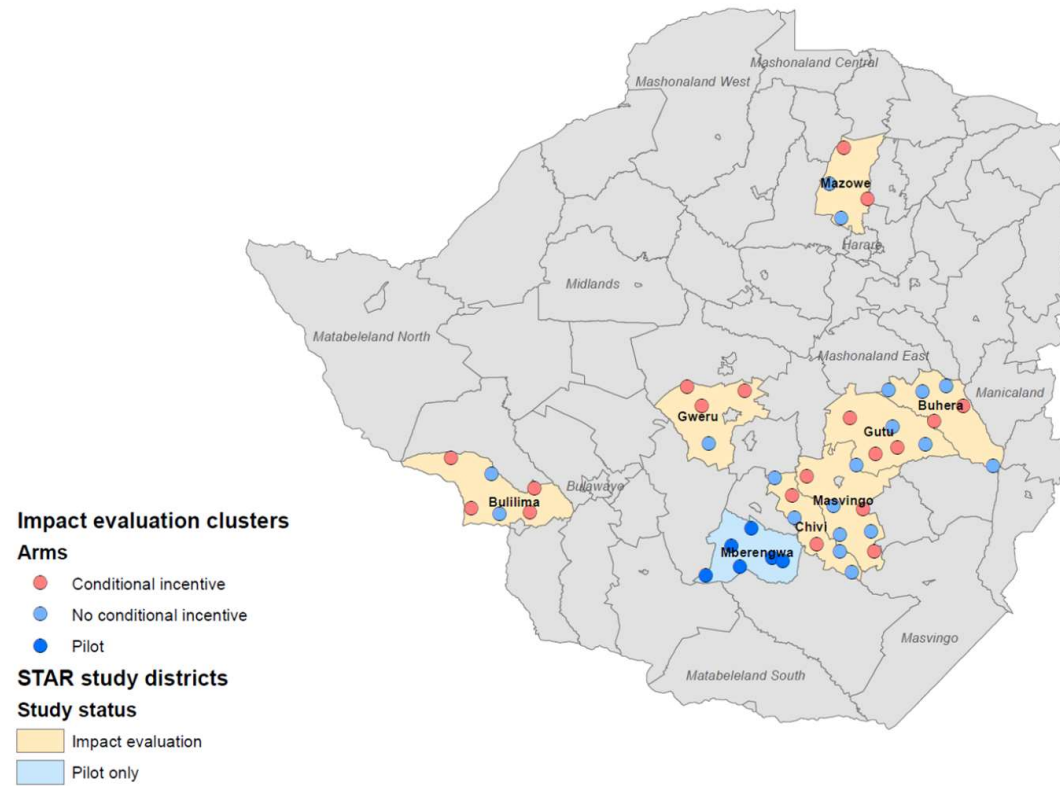

Supplement: bmjgh-2020-003866supp001.pdf [file bmjgh-2020-003866supp001.pdf]
